# Supplementary material
Source: PubMed Central journal article supplement (PMC3551341)

## A

STAT1 MSQWFELQQLD SKFLEQVHQLYDDSFPMEIRQYLAQWLEKQDWEHAAVDVS----FATIR 56  
 STAT3 MAQWNQLQQLDTRYLKLHQLYSDFPMELRQFLAPWIESQDWAYAASKES----HATIV 56  
 STAT4 MSQWNQVQQLEIKFLEQVDQFYDDNFPMEIRHLLAQWIETQDWEVASNNET----MATIL 56  
 STAT5A MAGWIAQQQLQGDALRQMQLVLYGQHFPIEVRYHLAQWIESQPWDAIDLDPQDRGQATQL 60  
 STAT5B MAMWIAQQQLQGDALHQMQLVLYGQHFPIEVRYHLSQWIESQAWDSIDLDPQENIKATQL 60  
 STAT6 MSLWGLVSKMPP---EKVQRLYVD-FPQHRLRHLG DWLESQPWEFLVGS DAFCCNLASAL 56  
  
 STAT1 FHDLLSQLDDQYSRFSLENNFLQHNRKSKRNLDNFQEDPVQMSMI IYNCLKEERKIL 116  
 STAT3 FHNLLGEIDQQYSRFLQESNVLYQHNLRRIKQFLQSRYLEKPM EIARIVARCLWEESRLL 116  
 STAT4 LQNLLIQQLDEQLGRVSKEKNLLLIHNLKRIRKVLQGKFHGNPMHVAVVISNCLREERRIL 116  
 STAT5A LEGLVQELQKKAEHQVGEDGFLLKIKLGHYATQLQNTYDRCPMELVRCIRHILYNEQRLV 120  
 STAT5B LEGLVQELQKKAEHQVGEDGFLLKIKLGHYATQLQSTYDRCPMELVRCIRHILYNEQRLV 120  
 STAT6 LSDTVQHLQASVGEQ-GEGSTILQH-----ISTLES IYQRDPLKLVATFRQILQGEKKAV 110  
  
 STAT1 ENAQRFNQ----- 124  
 STAT3 QTAATAAQ----- 124  
 STAT4 AAANMPIQ----- 124  
 STAT5A REAN----- 124  
 STAT5B REAN----- 124  
 STAT6 MEQFRHLPMPFHWK 124

## B

$\beta$ -Casein: AGATTTCTAGGAATTC

IL-2R $\alpha$ GAScn: CGTTTCTTCTAGGAAGTACCAAACATTTCTGATAATAGA

Figure S2

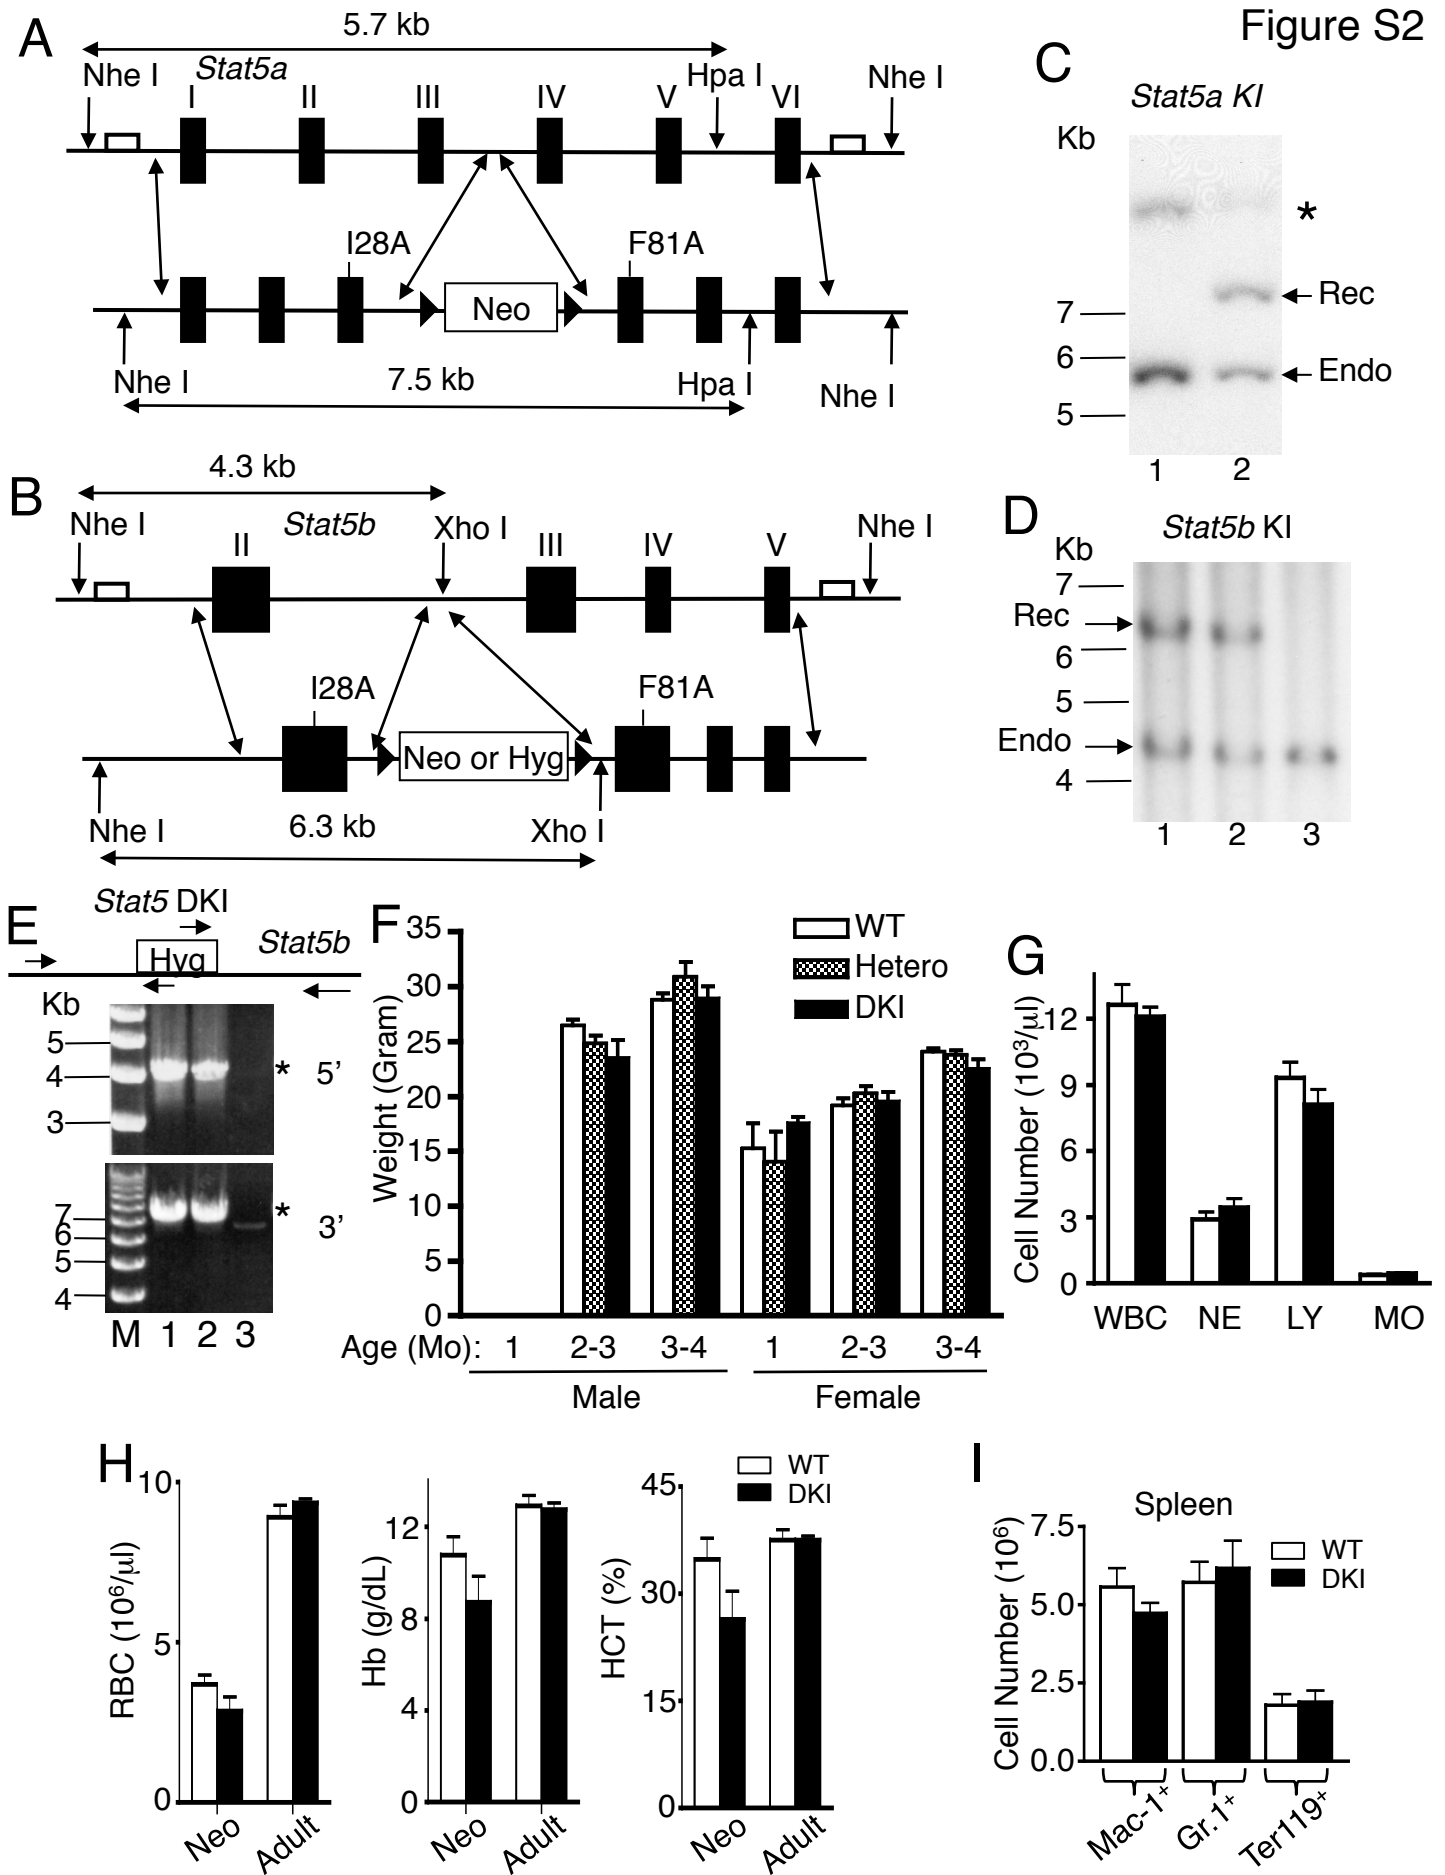

Figure S3

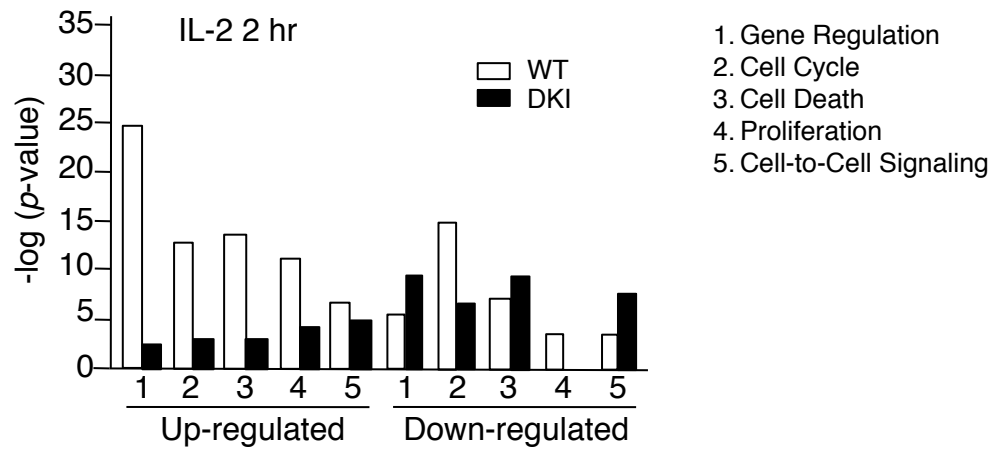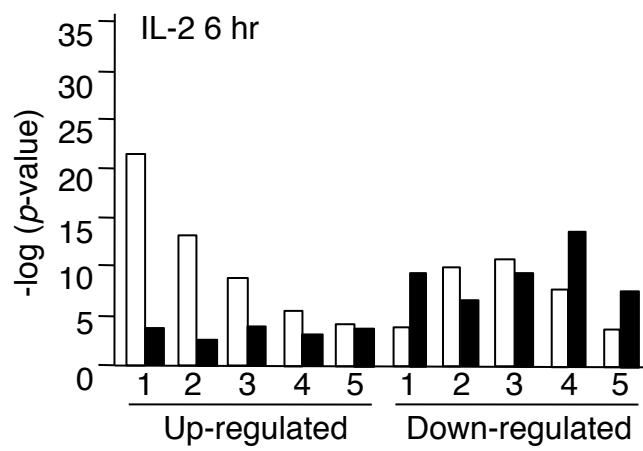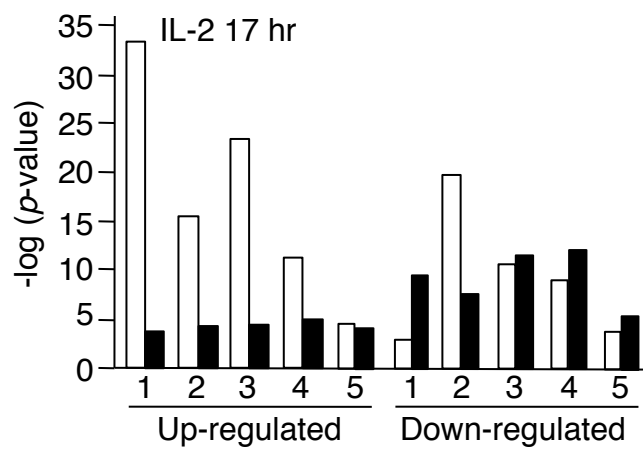

Figure S4

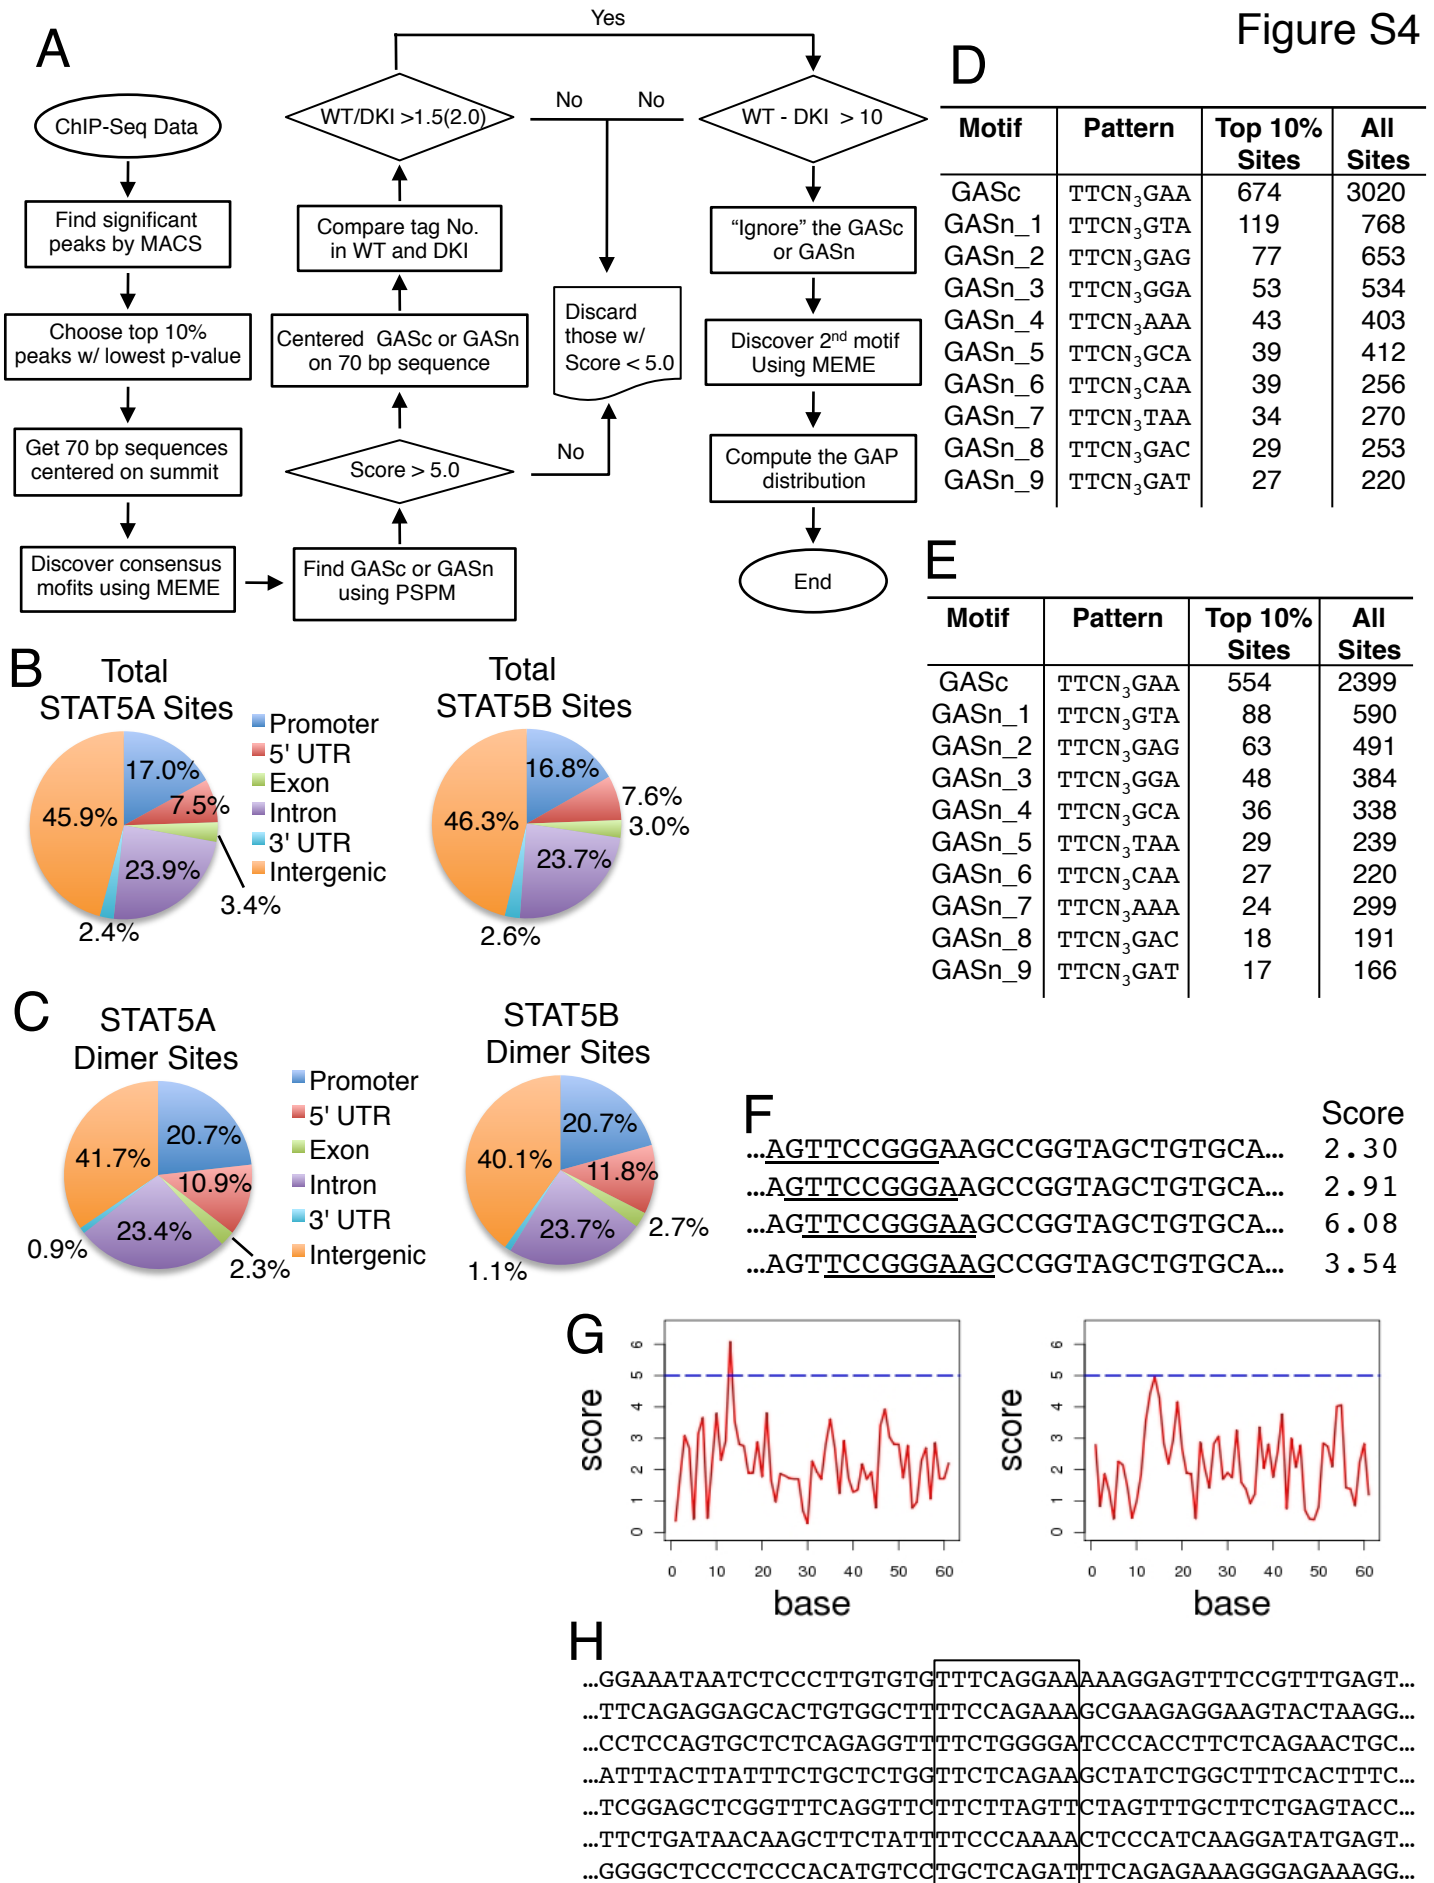

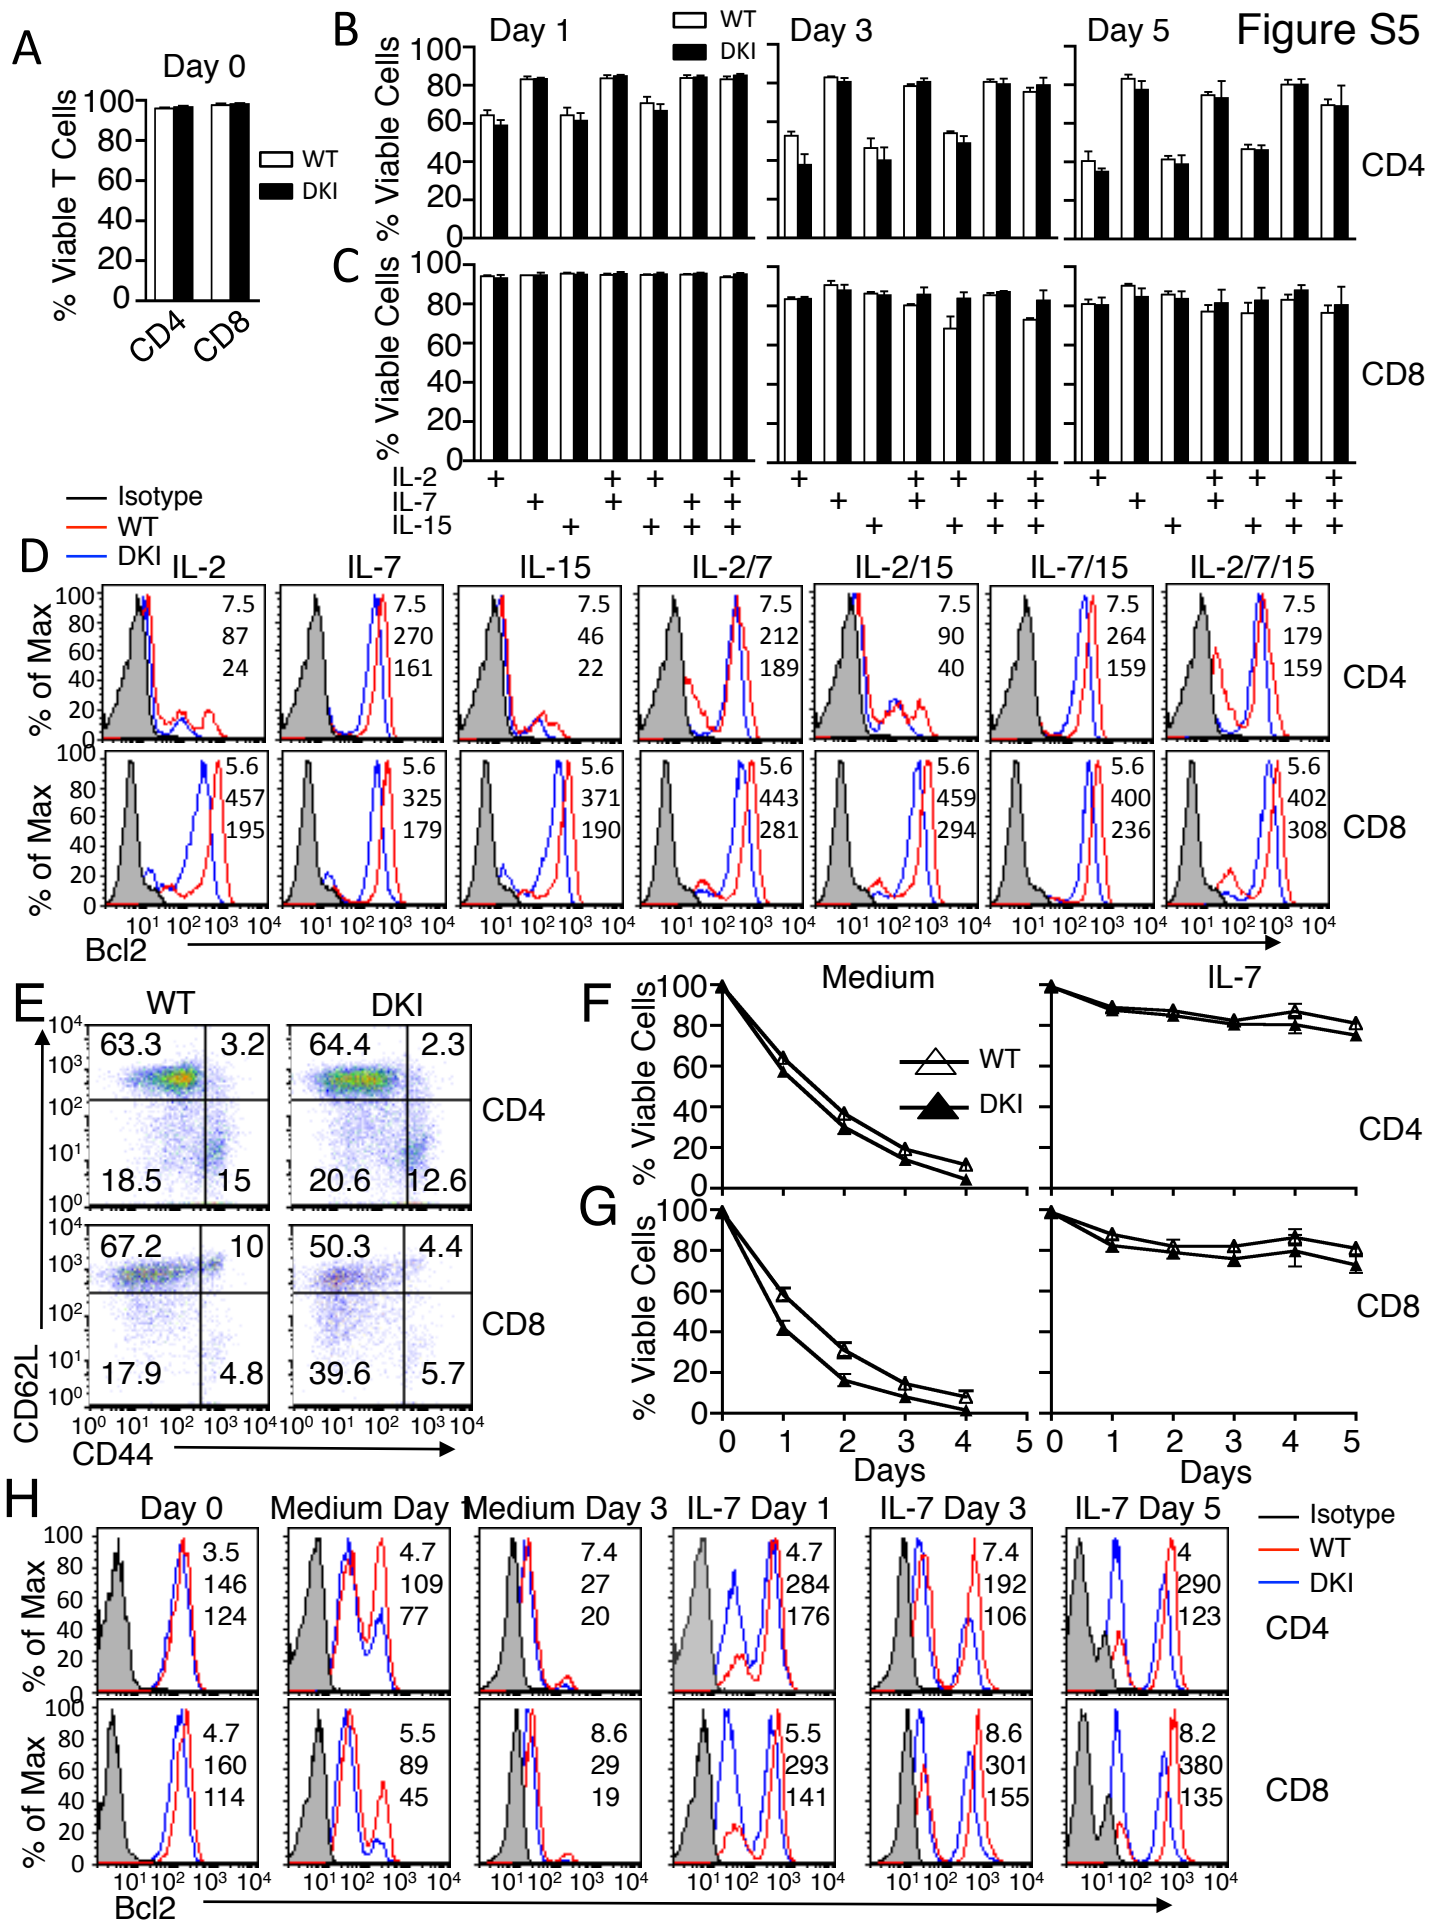

Figure S6

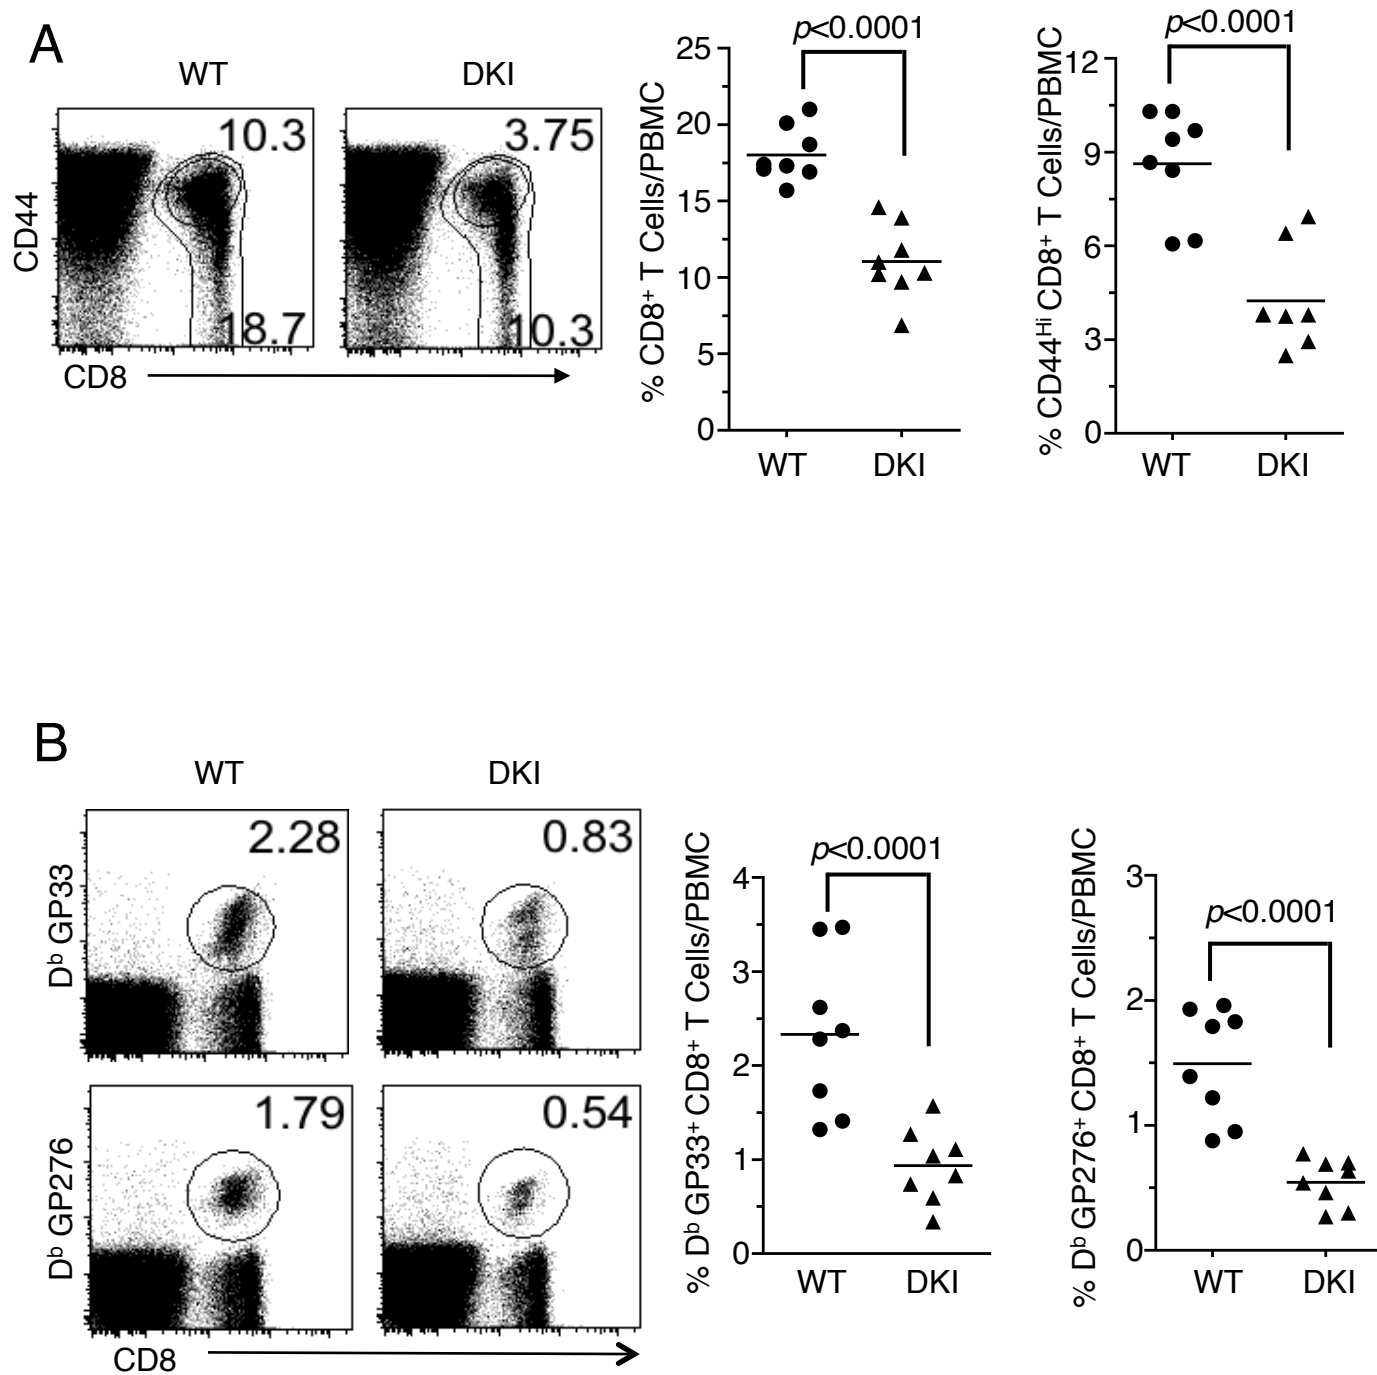

Supplement: NIHMS425956-supplement-07.pdf [file NIHMS425956-supplement-07.pdf]
